# Supplementary material for: Nanopore Sequencing Allows Recovery of High-Quality Completely Closed Genomes of All Cronobacter Species From Powdered Infant Formula Overnight Enrichments
Source: Preprints.org preprint supplement (doi:10.20944/preprints202407.1026.v1), 2024-07-15
Supplement: Supplementary file 1 [file supplementary]

## Sheet: Sheet1
Supplementary Table 1. List of the twenty-seven Cronobacter spp. genomes belonging to seven Cronobacter species used for the cgMLST analysis and species definition.
strain name	NCBI Accesion No.	Biosample Accesion	Specie	Contig No.	ST	Isolation Date	Place
5563_17	NZ_CP059045.1	SAMN15493123	sakazakii	1	1	2017-07-03	Poland
70402496	NZ_CP093376.1, NZ_CP093377.1, NZ_CP093375.1	SAMN26420280	sakazakii	3	4	2010	unknown
ATCC 29544	NZ_CP011047	SAMN03371468	sakazakii	1	8	1970	USA
ATCC 51329	NZ_CP012268.1	SAMN03938713	muytjensii	1	81	1980	unknown
ATCC BAA-894	NC_009778.1	SAMN02603913	sakazakii	1	1	?	unknown
C79	NZ_CP049144.1, NZ_CP049146.1, NZ_CP049145.1	SAMN14112906	sakazakii	3	458	2006-11-10	Mexico
C757	NZ_CP049150.1, NZ_CP049153.1, NZ_CP049152.1, NZ_CP049151.1	SAMN14112904	sakazakii	4	1	2006-06-14	Mexico
C767	NZ_CP049147.1, NZ_CP049149.1, NZ_CP049148.1	SAMN14112905	sakazakii	3	1	2006-06-14	Mexico
C105731	NZ_CP049154.1, NZ_CP049155.1	SAMN14112903	sakazakii	2	281	2008-02-07	Mexico
CFSA A14	CP101591.1, CP101592.1, CP101593.1, CP101594.1	SAMN29674978	dublinensis	4	826	2021-05-01	China
CMCC45402	NC_023032.1, NC_023024.1, NC_023025.1	SAMN02641531	malonaticus	3	7	?	China
Crono-589	NZ_CP080591.1, NZ_CP080592.1, NZ_CP080593.1	SAMN20586791	sakazakii	3	40	2020-08-01	China
Crono-684	NZ_CP080594.1, NZ_CP080595.1, NZ_CP080596.1	SAMN20587836	sakazakii	3	4	2020-08-01	China
CS-09	CP027109.1, CP027110.1, CP049262.1, CP049261.1	SAMN07540306	sakazakii	4	1	2016-01-17	Mexico
CS-931	NZ_CP027107.1, NZ_CP027108.1, NZ_CP049260.1	SAMN07540307	sakazakii	3	226	2016-01-12	Mexico
ES15	NC_017933.1	SAMN02603850	sakazakii	1	125	unknown	unknown
GZcsf-1	CP028974.1, CP028975.1, CP028976.1	SAMN08928172	sakazakii	3	256	2015	China
JXES-28	NZ_CP098777.1, NZ_CP098775.1, NZ_CP098776.1	SAMN28951057	sakazakii	3	184	2021-09-30	China
LMG 23823	NZ_CP012266.1, NZ_CP012267.1	SAMN03938717	dublinensis	2	106	2007	Ireland
LMG 26250	NZ_CP012264.1, NZ_CP012265.1	SAMN03938712	condimenti	2	98	2007	Slovakia
MOD1-GK1025B	CP078106.1, CP078107.1, CP078108.1, CP078109.1	SAMN04329637	sakazakii	4	64	unknown	Germany
MOD1-H322	NZ_CP078110.1, NZ_CP078111.1, NZ_CP078112.1	SAMN06124518	sakazakii	3	83	2011	Switzerland
NCTC 8155	NZ_CP012253	SAMN03938714	sakazakii	1	4	1980	United Kingdom
NCTC 9529	NZ_CP012257.1, NZ_CP012258.1	SAMN03938715	universalis	2	54	1980	United Kingdom
Sp291 CP004091	CP004091.1	SAMN02604116	sakazakii	1	4	unknown	unknown
USDA-ARS-USMARC-54664	NZ_CP104108.1, NZ_CP104109.1	SAMN30466962	sakazakii	2	446	2013-10-11	USA
z3032	FN543093.2, FN543094.1, FN543095.1, FN543096.1	SAMEA2272673	turicensis	4	19	unknown	unknown
CDC 5960-70	AAXVRT01	SAMN09426159	dublinencis	24	unknown	1970	USA
SK90	AAXVRQ01	SAMN09426133	sakazakii	27	4	unknown	Canada

## Sheet: Sheet3
	Cronobacter sakazakii	Cronobacter	sakazakii		FAX33104_	E477	_PIF	FAX33104_E477_f	_f		14	B14	sample_B14	b14.fastq
	Cronobacter dublinensis	Cronobacter	dublinensis		FAX33104_	E515	_PIF	FAX33104_ E515 _f	_f		15	B15	sample_B15	b15.fastq
	Cronobacter muytjensii	Cronobacter	muytjensii		FAX33104_	E603	_PIF	FAX33104_ E603 _f	_f		16	B16	sample_B16	b16.fastq
	Cronobacter sakazakii	Cronobacter	sakazakii		FAX33104_	E604	_PIF	FAX33104_ E604 _f	_f		17	B17	sample_B17	b17.fastq
	Cronobacter dublinensis	Cronobacter	dublinensis		FAX33104_	E791	_PIF	FAX33104_ E791 _f	_f		18	B18	sample_B18	b18.fastq
	Cronobacter universalis	Cronobacter	universalis		FAX33104_	E797	_PIF	FAX33104_ E797 _f	_f		19	B19	sample_B19	b19.fastq
	Cronobacter sakazakii	Cronobacter	sakazakii		FAX33104_	E825	_PIF	FAX33104_ E825 _f	_f		20	B20	sample_B20	b20.fastq
	Cronobacter sakazakii	Cronobacter	sakazakii		FAX33104_	EB13	_PIF	FAX33104_ EB13 _f	_f		21	B21	sample_B21	b21.fastq
	Cronobacter turicensis	Cronobacter	turicensis		FAX33104_	EB18	_PIF	FAX33104_ EB18 _f	_f		22	B22	sample_B22	b22.fastq
	Cronobacter sakazakii	Cronobacter	sakazakii		FAX33104_	E899	_PIF	FAX33104_ E899 _f	_f		23	B23	sample_B23	b23.fastq
